# Supplementary material for: Physicochemical properties of proton conducting membranes based on ionic liquid impregnated polymer for fuel cells
Source: Royal Society of Chemistry journal article supplement (doi:10.1039/b602280d), 2006-01-01
Supplement: b602280d.pdf [file b602280d.pdf]

# Supplementary Material (ESI) for Journal of Materials Chemistry  
# This journal is (C) The Royal Society of Chemistry 2006

Electronic Supplementary Information

**Fig.S1.** Variation of dielectric constant with temperature for polymer electrolytes having composition DMOImTf + PVdF-HFP + 2M HCF<sub>3</sub>SO<sub>3</sub> +x(ml) PC with (a) x = 0 and (b) x = 0.1 at 42Hz(●), 100Hz(x), 200Hz(○), 400Hz(+), 600Hz(◇) and 1KHz(▲).

**Fig.S2.** Dependence of conductivity upon temperature for plasticized polymer electrolytes having composition DMOImTf + PVdF-HFP + 2M HCF<sub>3</sub>SO<sub>3</sub> + 0.1ml PC during first heating (○), cooling (-) and second heating (x).

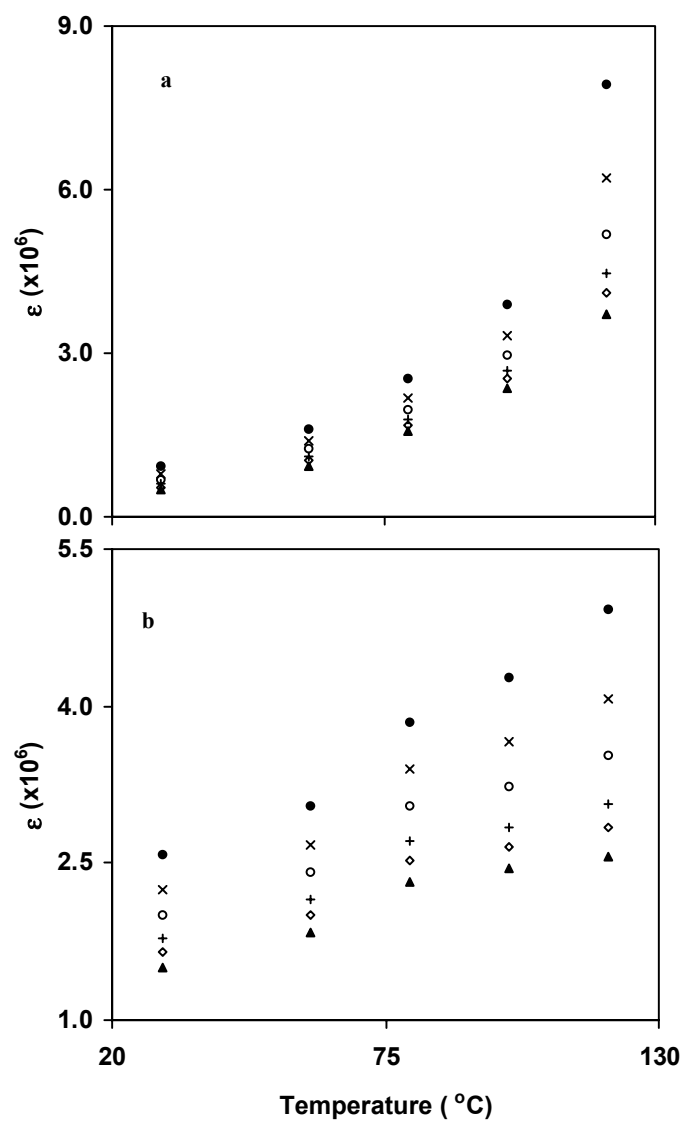

Fig. S1

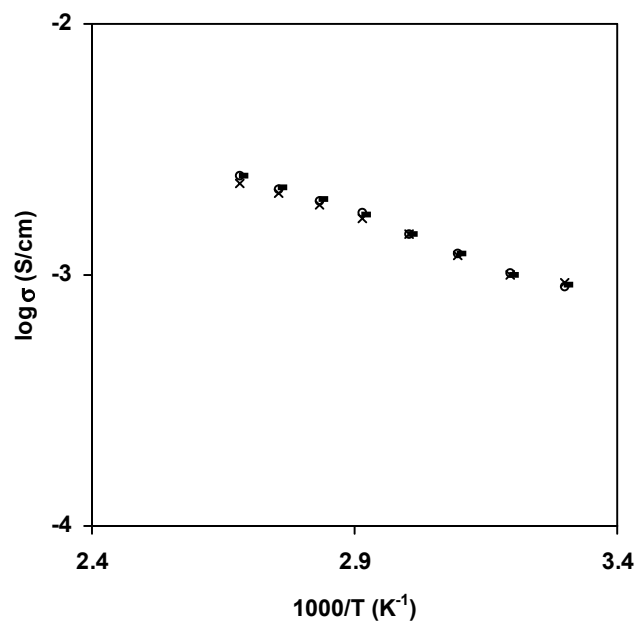

Fig. S2
